# Supplementary material for: Fuchs' Endothelial Corneal Dystrophy in Patients With Myotonic Dystrophy, Type 1
Source: PubMed Central journal article supplement (PMC6005624; doi:10.1167/iovs.17-23160), 2018-06
Supplement: iovs-59-06-65_s01.pdf [file iovs-59-06-65_s01.pdf]

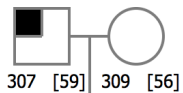

Pedigree 2

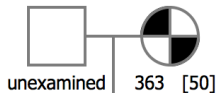

Pedigree 3

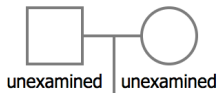

Pedigree 4

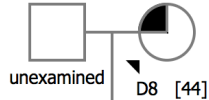

Pedigree 5

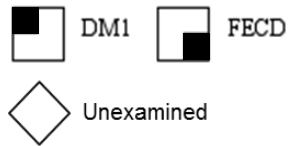

**Supplemental Figure.** Family pedigrees of related subjects demonstrating co-segregation of myotonic dystrophy, type 1 (DM1) with Fuchs endothelial corneal dystrophy (FECD).

Labels: Subject ID [Age].
