# Supplementary material for: Fuchs' Endothelial Corneal Dystrophy in Patients With Myotonic Dystrophy, Type 1
Source: PubMed Central journal article supplement (PMC6005624; doi:10.1167/iovs.17-23160), 2018-06
Supplement: iovs-59-06-65_s02.pdf [file iovs-59-06-65_s02.pdf]

| Supplemental Table. Demographic, Microscopy, and Repeat Expansions of DM1 Patients                                                                                           |     |     |                         |             |          |     |       |      |            |         |                 |                          |
|------------------------------------------------------------------------------------------------------------------------------------------------------------------------------|-----|-----|-------------------------|-------------|----------|-----|-------|------|------------|---------|-----------------|--------------------------|
| Subject                                                                                                                                                                      | Sex | Age | Proband or Relationship | FECB Status | Krachmer |     | TCF4  |      | DM1 Status | DMPK    |                 | Cataract or Lens Implant |
|                                                                                                                                                                              |     |     |                         |             | OD       | OS  | Short | Long |            | Short   | Long            |                          |
| PEDIGREE 1                                                                                                                                                                   |     |     |                         |             |          |     |       |      |            |         |                 |                          |
| 246                                                                                                                                                                          | F   | 68  | proband                 | Y           | 6        | 6   | 18    | 27   | Y          | 11      | 85              | Y                        |
| 272                                                                                                                                                                          | F   | 68  | identical twin          | Y           | 6        | 6   | 17    | 26   | Y          |         | expanded***     | Y                        |
| 278                                                                                                                                                                          | M   | 59  | brother                 | Y           | unable   | 2.5 | 15    | 25   | Y          | 11      | 103             | Y                        |
| 247                                                                                                                                                                          | F   | 38  | daughter                | N           | 0        | 0   | 27    | 29   | N          |         | not expanded*** | N                        |
| 263                                                                                                                                                                          | F   | 56  | sister                  | Y           | 4        | 5   | 26    | 26*  | Y          |         | expanded***     | N                        |
| 264                                                                                                                                                                          | F   | 25  | niece                   | Y           | 2        | 2.5 | 27    | 27*  | Y          |         | expanded***     | N                        |
| D4                                                                                                                                                                           | F   | 36  | niece                   | Y           | 4        | 4   | 19    | 25   | Y          | 13      | 783             | Y                        |
| D5                                                                                                                                                                           | F   | 61  | sister-in-law           | N           | 1        | 1   | 12    | 19   | N          |         | not expanded*** | N                        |
| PEDIGREE 2                                                                                                                                                                   |     |     |                         |             |          |     |       |      |            |         |                 |                          |
| 308                                                                                                                                                                          | F   | 19  | proband                 | N           | 0        | 0   | 18    | 23   | Y          | 15      | 253             | N                        |
| 307                                                                                                                                                                          | M   | 59  | father                  | N           | 0        | 0   | 18    | 25   | Y          |         | expanded***     | N                        |
| 309                                                                                                                                                                          | F   | 56  | mother                  | N           | 0        | 0   | 18    | 23   | N          |         | not expanded*** | N                        |
| PEDIGREE 3                                                                                                                                                                   |     |     |                         |             |          |     |       |      |            |         |                 |                          |
| 364                                                                                                                                                                          | F   | 22  | proband                 | Y           | 2        | 2   | 12    | 12*  | Y          | unknown | 450             | Y                        |
| 363                                                                                                                                                                          | F   | 50  | mother                  | Y           | 4        | 3   | 12    | 12*  | Y          | 11      | 83              | Y                        |
| PEDEGREE 4                                                                                                                                                                   |     |     |                         |             |          |     |       |      |            |         |                 |                          |
| 429                                                                                                                                                                          | F   | 67  | proband                 | N           | 0        | 0   | 12    | 19   | Y          |         | expanded***     | Y                        |
| 424                                                                                                                                                                          | F   | 69  | sister                  | Y           | 2        | 2   | 12    | 19   | N          |         | unknown         | Y                        |
| PEDIGREE 5                                                                                                                                                                   |     |     |                         |             |          |     |       |      |            |         |                 |                          |
| D8                                                                                                                                                                           | F   | 44  | proband                 | N           | 0        | 0   | 12    | 12*  | Y          | 11      | 500             | N                        |
| D9                                                                                                                                                                           | F   | 25  | daughter                | N           | 0        | 0   | 12    | 15   | Y          | 11      | 800             | N                        |
| UNRELATED SUBJECTS                                                                                                                                                           |     |     |                         |             |          |     |       |      |            |         |                 |                          |
| D3                                                                                                                                                                           | M   | 48  | proband                 | Y           | 2        | 2   | 12    | 17   | Y          | 13      | 230             | Y                        |
| 315                                                                                                                                                                          | F   | 39  | proband                 | Y           | 4        | 4   | 23    | 25   | Y          | 11      | 223             | N                        |
| D10                                                                                                                                                                          | M   | 39  | proband                 | Y           | 2.5      | 2.5 | **    | **   | Y          | 14      | 633             | Y                        |
| D1                                                                                                                                                                           | M   | 56  | proband                 | N           | 0        | 0   | 19    | 26   | Y          | 5       | 377             | Y                        |
| D2                                                                                                                                                                           | F   | 54  | proband                 | N           | 0        | 0   | 12    | 12   | Y          | 20      | 376             | N                        |
| 341                                                                                                                                                                          | F   | 35  | proband                 | N           | 0        | 0   | 12    | 23   | Y          | 5       | 800             | Y                        |
| 389                                                                                                                                                                          | M   | 44  | proband                 | N           | 0        | 1   | **    | **   | Y          | 5       | 183             | Y                        |
| D6                                                                                                                                                                           | M   | 41  | proband                 | N           | 0        | 0   | 15    | 17   | Y          | 5       | 790             | Y                        |
| D7                                                                                                                                                                           | M   | 35  | proband                 | N           | 0        | 0   | 12    | 16   | Y          | 14      | 650             | Y                        |
| * Genescan analysis disclosed only one allele length. The absence of an expanded allele was confirmed by Southern Blotting, indicating that both alleles are the same length |     |     |                         |             |          |     |       |      |            |         |                 |                          |
| ** No specimen available                                                                                                                                                     |     |     |                         |             |          |     |       |      |            |         |                 |                          |
| ***Data provided via verbal medical history                                                                                                                                  |     |     |                         |             |          |     |       |      |            |         |                 |                          |
